# Supplementary material for: Adoption of a Short-Term (4-Week) Vegan Diet as Part of ‘Veganuary’ Significantly Reduces Saturated Fatty Acid (SFA), Cholesterol, B12, and Iodine Intake in Omnivorous Individuals—An Observational Study
Source: MDPI journal article supplement (doi:10.3390/nu15234967), 2023-11-30
Supplement: s1 [file s1]

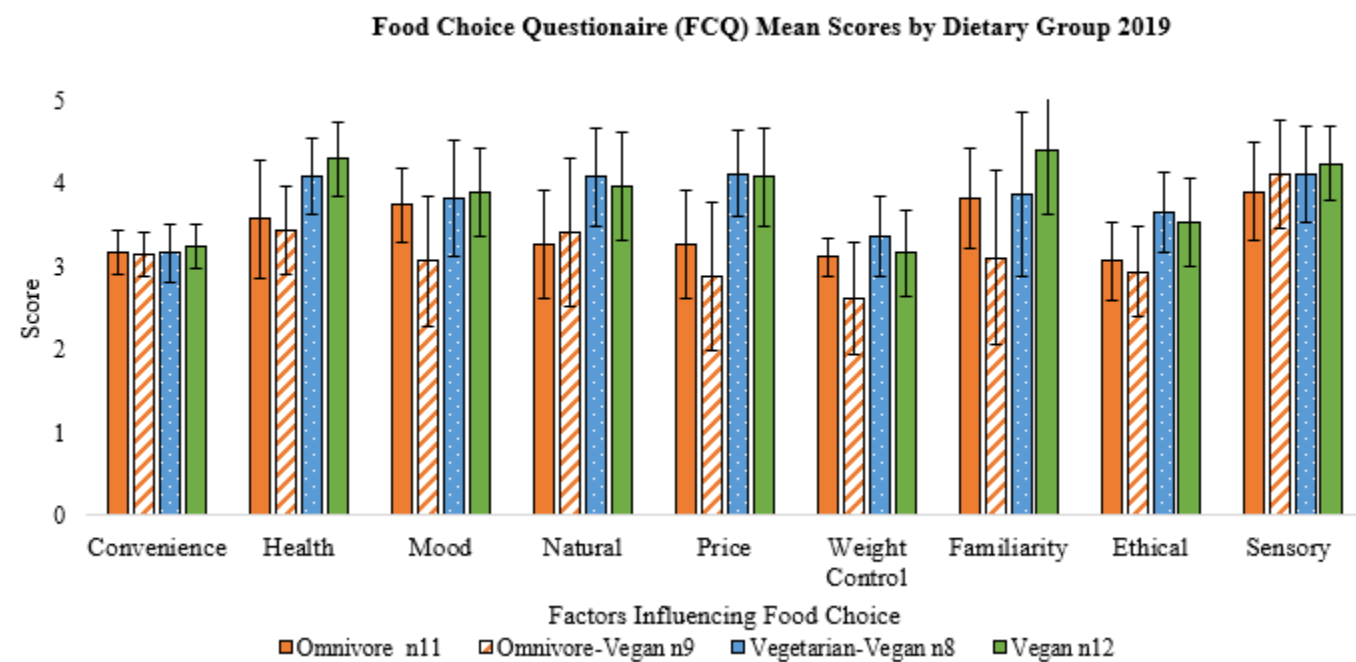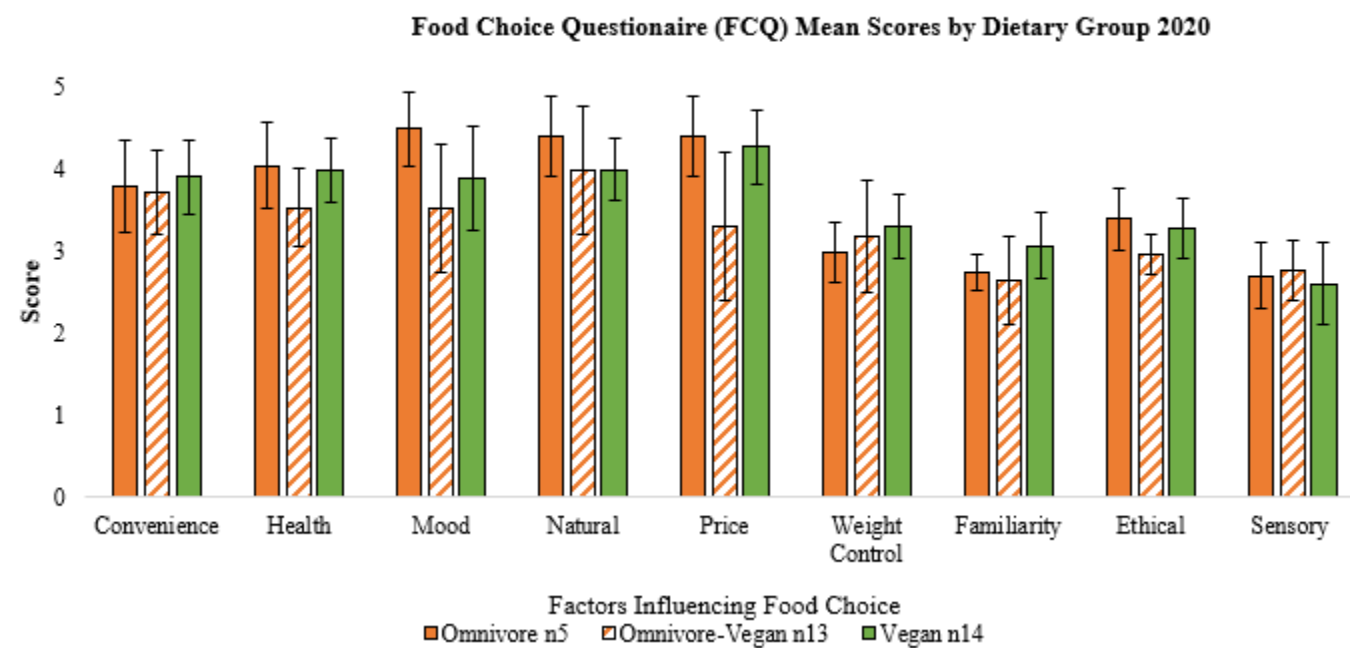

**Figure S1.** Factors influencing food choice; results from the Food Choice Questionnaire (FCQ) in 2019 and 2020.

**Table S1.** Questions assessing micronutrient knowledge in the 2019 cohort.

| Question                                                                                                                               |
|----------------------------------------------------------------------------------------------------------------------------------------|
| 1. Before you volunteered to take part in this study were you aware of any symptoms associated with micronutrient deficiencies?        |
| 1. A. If Yes, what deficiency symptoms are you aware of? Please list all of the symptoms you are aware of. Be as specific as possible. |
| 2. Are you confident that your current diet provides adequate micronutrients?                                                          |

**Table S2.** Questions assessing iodine knowledge in the 2020 cohort.

| Question                                                                                                                                | Responses                                                                                                                                                                                                                                                                                                |
|-----------------------------------------------------------------------------------------------------------------------------------------|----------------------------------------------------------------------------------------------------------------------------------------------------------------------------------------------------------------------------------------------------------------------------------------------------------|
| 1. Are you aware of the nutrient iodine?                                                                                                | Yes<br>No                                                                                                                                                                                                                                                                                                |
| 2. Which of the following do you think is the richest food source of iodine in the UK?                                                  | Fruit<br>Vegetables<br>Eggs<br>Meat and meat products<br>Salt (table)<br>Milk and Dairy<br>Bread<br>Dairy-alternative or milk substitute<br>Fish and seafood<br>Nuts and seeds<br>Breakfast cereals<br>Non-dairy yogurt and cheese<br>Do not know                                                        |
| 3. What do you understand to be the main health problem/s associated with not having enough iodine in the diet? (select all that apply) | Weak bones and teeth<br>Heart conditions<br>Malformations in pregnancy (Birth defects)<br>Impaired physical development during childhood<br>Neural Tube Defects<br>Allergy<br>Do not know<br>Blindness<br>Goitre<br>Weak immune system<br>Mental Retardation<br>Arthritis<br>Other (free text available) |
| 4. Based on your understanding, at which stage of the life cycle do you think iodine is most important?                                 | Babies and young children<br>Teenagers<br>Adults<br>Elderly adults<br>Pregnant and breastfeeding women<br>Women of childbearing age<br>Don't know                                                                                                                                                        |
| 5. Do you think iodine deficiency is a common health problem in the UK and Ireland now?                                                 | Yes<br>No                                                                                                                                                                                                                                                                                                |
| 6. Do you think that your present diet provides you with enough iodine?                                                                 | Yes<br>No<br>Unsure                                                                                                                                                                                                                                                                                      |
| 7. Do you plan your diet to ensure you eat foods rich in iodine?                                                                        | Yes<br>No<br>Unsure                                                                                                                                                                                                                                                                                      |
| 8. Have you ever received any information related to iodine and health?                                                                 | Yes (free text available)<br>No<br>Unsure                                                                                                                                                                                                                                                                |

**Table S3.** Motivation towards following a vegan diet for individuals recruited in 2019  
Higher mean (SD) scores relate to greater motivation for each trait (max score 5).

| Motivation for a vegan diet<br>Mean (SD) | Vegan (VV)<br>( <i>n</i> 24) | Vegetarian-<br>vegan (VegV)<br>( <i>n</i> 14) | Omnivore (OO)<br>( <i>n</i> 21) | Omnivore-<br>vegan (OV)<br>( <i>n</i> 22) | P      |
|------------------------------------------|------------------------------|-----------------------------------------------|---------------------------------|-------------------------------------------|--------|
| Health                                   | 3.8 (1.2)                    | 4.1 (0.9)                                     | 3.5 (1.3)                       | 3.7 (1.2)                                 | 0.539  |
| Factory farming                          | 4.2 (1.0)                    | 4.3 (1.0)                                     | 2.6 (1.0)                       | 2.9 (1.4)                                 | <.001* |
| Sustainability                           | 4.6 (0.7)                    | 4.4 (0.6)                                     | 3.0 (1.4)                       | 3.6 (1.2)                                 | <.001* |
| Climate protection                       | 4.4 (0.7)                    | 4.4 (0.6)                                     | 3.2 (1.4)                       | 3.6 (1.2)                                 | <.001* |
| Vegan friends                            | 2.0 (1.2)                    | 2.7 (1.4)                                     | 1.4 (0.6)                       | 1.7 (0.9)                                 | 0.005* |
| Food scandals                            | 2.1 (1.2)                    | 2.5 (1.1)                                     | 1.8 (0.6)                       | 1.6 (1.0)                                 | 0.048* |
| Animal welfare                           | 4.2 (1.0)                    | 4.3 (1.1)                                     | 2.9 (1.0)                       | 3.0 (1.2)                                 | <.001* |
| Food safety                              | 2.8 (1.2)                    | 3.5 (1.3)                                     | 2.7 (1.2)                       | 2.2 (1.2)                                 | 0.017* |
| Food availability                        | 2.3 (1.3)                    | 3.1 (1.3)                                     | 2.5 (1.1)                       | 2.2 (1.2)                                 | 0.130  |
| Food choice                              | 2.3 (1.2)                    | 3.3 (1.2)                                     | 2.4 (1.1)                       | 2.1 (1.2)                                 | 0.016* |
| Food trends                              | 1.7 (1.0)                    | 2.2 (1.6)                                     | 1.7 (0.8)                       | 1.9 (1.3)                                 | 0.462  |
| Food taste                               | 2.5 (1.4)                    | 3.8 (1.3)                                     | 3.4 (1.3)                       | 2.4 (1.4)                                 | 0.004* |
| Vegan family                             | 1.6 (1.1)                    | 2.0 (1.5)                                     | 1.3 (0.6)                       | 1.4 (0.9)                                 | 0.177  |
| Personal morals                          | 4.1 (1.1)                    | 4.3 (1.0)                                     | 2.3 (1.0)                       | 2.7 (1.4)                                 | <.001* |
| Rotten meat                              | 2.0 (1.4)                    | 2.5 (1.4)                                     | 2.3 (1.5)                       | 1.7 (1.3)                                 | 0.360  |
| Religion                                 | 1.3 (0.7)                    | 1.3 (1.0)                                     | 1.2 (0.7)                       | 1.0 (0.2)                                 | 0.618  |
| New year resolution                      | 1.6 (1.1)                    | 1.9 (1.5)                                     | 1.3 (0.5)                       | 2.0 (1.1)                                 | 0.193  |
| Previous experience                      | 1.5 (0.9)                    | 3.0 (1.7)                                     | 2.5 (1.0)                       | 1.8 (1.3)                                 | 0.001* |
| Vegan Society support                    | 2.2 (1.3)                    | 2.9 (1.6)                                     | 1.2 (0.4)                       | 1.6 (1.0)                                 | <.001* |
| Challenge                                | 2.2 (1.4)                    | 3.3 (1.5)                                     | 1.8 (0.9)                       | 3.2 (1.3)                                 | <.001* |
| Cost or expense                          | 1.8 (1.0)                    | 2.0 (1.4)                                     | 2.6 (1.3)                       | 2.0 (1.3)                                 | 0.156  |
| Food variety                             | 2.1 (1.2)                    | 2.6 (1.5)                                     | 2.5 (1.3)                       | 2.2 (1.4)                                 | 0.648  |
| Novelty                                  | 1.3 (0.7)                    | 1.9 (1.4)                                     | 2.0 (1.3)                       | 2.3 (1.3)                                 | 0.029* |
| Social media                             | 1.9 (1.3)                    | 2.1 (1.3)                                     | 1.4 (0.7)                       | 1.6 (1.2)                                 | 0.197  |
| Weight loss                              | 1.4 (0.9)                    | 2.5 (1.2)                                     | 1.9 (1.2)                       | 2.5 (1.5)                                 | 0.011* |
| Media and TV                             | 2.8 (1.4)                    | 2.7 (1.5)                                     | 1.5 (0.7)                       | 2.0 (1.5)                                 | 0.197  |

\*Significance between dietary groups assessed by ANOVA (P = < 0.05).

**Table S4.** Motivation towards following a vegan diet for individuals recruited in 2020  
Higher mean (SD) scores relate to greater motivation for each trait (max score 5).

| Motivation for a vegan diet<br>Mean (SD) | Vegan (VV)<br>( <i>n</i> 45) | Vegetarian-<br>vegan (VegV)<br>( <i>n</i> 6) | Omnivore (OO)<br>( <i>n</i> 6) | Omnivore-<br>vegan (OV)<br>( <i>n</i> 16) | P      |
|------------------------------------------|------------------------------|----------------------------------------------|--------------------------------|-------------------------------------------|--------|
| Health                                   | 3.1 (1.4)                    | 3.2 (1.5)                                    | 3.2 (1.3)                      | 2.5 (1.3)                                 | 0.584  |
| Factory farming                          | 4.4 (1.0)                    | 4.0 (0.9)                                    | 3.5 (1.7)                      | 2.6 (1.4)                                 | 0.002* |
| Sustainability                           | 4.2 (1.0)                    | 4.5 (1.3)                                    | 3.7 (1.5)                      | 3.8 (1.4)                                 | 0.500  |
| Climate protection                       | 4.3 (1.1)                    | 3.8 (1.2)                                    | 3.5 (1.4)                      | 3.8 (1.5)                                 | 0.301  |
| Vegan friends                            | 1.8 (1.1)                    | 2.3 (1.4)                                    | 1.3 (0.5)                      | 1.8 (1.0)                                 | 0.523  |
| Food scandals                            | 2.5 (1.3)                    | 2.7 (1.0)                                    | 2.8 (1.8)                      | 1.5 (0.9)                                 | 0.063  |
| Animal welfare                           | 4.8 (0.7)                    | 4.0 (1.1)                                    | 2.8 (1.2)                      | 3.3 (1.5)                                 | 0.001* |
| Food safety                              | 2.1 (1.4)                    | 2.5 (1.4)                                    | 2.5 (1.5)                      | 2.0 (1.4)                                 | 0.887  |
| Food availability                        | 2.0 (1.2)                    | 2.7 (1.5)                                    | 2.3 (1.2)                      | 1.5 (1.2)                                 | 0.596  |
| Food choice                              | 2.2 (1.3)                    | 2.3 (1.4)                                    | 3.5 (1.3)                      | 2.0 (1.4)                                 | 0.551  |
| Food trends                              | 1.4 (0.8)                    | 2.3 (1.0)                                    | 1.8 (1.0)                      | 1.6 (0.7)                                 | 0.055  |
| Food taste                               | 2.2 (1.3)                    | 2.8 (1.5)                                    | 2.8 (1.8)                      | 2.4 (1.6)                                 | 0.125  |
| Vegan family                             | 1.9 (1.3)                    | 2.7 (1.9)                                    | 1.3 (0.5)                      | 1.6 (1.0)                                 | 0.149  |
| Personal morals                          | 4.6 (0.9)                    | 3.8 (0.4)                                    | 2.5 (1.4)                      | 3.5 (1.5)                                 | 0.001* |
| Rotten meat                              | 1.7 (1.0)                    | 2.2 (1.6)                                    | 1.7 (1.2)                      | 1.5 (1.0)                                 | 0.711  |
| Religion                                 | 1.0 (0.0)                    | 1.2 (0.4)                                    | 2.0 (0.0)                      | 1.0 (0.0)                                 | 0.160  |
| New year resolution                      | 1.3 (0.8)                    | 2.0 (1.7)                                    | 2.5 (0.8)                      | 1.6 (1.2)                                 | 0.210  |
| Previous experience                      | 1.3 (0.8)                    | 2.5 (1.8)                                    | 1.5 (0.8)                      | 1.5 (0.9)                                 | 0.058  |
| Vegan Society support                    | 2.1 (1.5)                    | 2.3 (1.5)                                    | 1.2 (0.4)                      | 1.4 (0.9)                                 | 0.167  |
| Challenge                                | 1.6 (0.9)                    | 2.0 (1.1)                                    | 2.5 (1.3)                      | 2.9 (1.5)                                 | 0.005* |
| Cost or expense                          | 1.4 (0.8)                    | 2.5 (1.4)                                    | 3.2 (1.3)                      | 1.2 (0.5)                                 | 0.001* |
| Social media                             | 1.7 (1.0)                    | 2.2 (1.0)                                    | 1.3 (0.5)                      | 1.4 (1.0)                                 | 0.297  |
| COVID-19 infection                       | 1.2 (0.7)                    | 1.8 (1.3)                                    | 1.8 (1.2)                      | 1.1 (0.5)                                 | 0.001* |
| Disease outbreaks (in<br>general)        | 1.4 (1.1)                    | 2.0 (1.6)                                    | 2.2 (1.5)                      | 1.1 (0.3)                                 | 0.007* |

\*Significance between dietary groups assessed by ANOVA (P = < 0.05).

**Table S5.** Average micronutrient intake provided by dietary supplements recorded in Food Frequency Questionnaire (FFQ) in the 2019 cohort at baseline and end, compared with 10% of the Reference Nutrient Intake (RNI).

| Baseline         |                              |        |       |                                           |       |       |                                 |       |       |                                       |       |       |            |       |
|------------------|------------------------------|--------|-------|-------------------------------------------|-------|-------|---------------------------------|-------|-------|---------------------------------------|-------|-------|------------|-------|
|                  | Vegan (VV)<br>( <i>n</i> 12) |        |       | Vegetarian-vegan (VegV)<br>( <i>n</i> 10) |       |       | Omnivore (OO)<br>( <i>n</i> 12) |       |       | Omnivore-vegan (OV)<br>( <i>n</i> 12) |       |       | 50% of RNI |       |
|                  | <i>n</i>                     | Mean   | SD    | <i>n</i>                                  | Mean  | SD    | <i>n</i>                        | Mean  | SD    | <i>n</i>                              | Mean  | SD    | Female     | Male  |
| Vitamin A (µg)   | 4                            | 1000.0 | 400.0 | 2                                         | 800.0 | 0.0   | 3                               | 633.3 | 288.7 | 2                                     | 600.0 | 282.8 | 300.0      | 350.0 |
| Vitamin C (mg)   | 4                            | 85.0   | 5.8   | 2                                         | 85.0  | 7.1   | 3                               | 199.0 | 140.1 | 2                                     | 198.6 | 224.2 | 20.0       | 20.0  |
| Thiamine (mg)    | 5                            | 1.7    | 0.8   | 3                                         | 1.8   | 0.7   | 2                               | 7.3   | 6.7   | 1                                     | 8.4   | 0.0   | 0.4        | 0.5   |
| Riboflavin (mg)  | 5                            | 2.0    | 0.8   | 3                                         | 2.1   | 0.7   | 2                               | 3.8   | 1.4   | 1                                     | 10.7  | 0.0   | 0.6        | 0.7   |
| Niacin (mg)      | 4                            | 16.8   | 1.1   | 3                                         | 13.7  | 5.8   | 2                               | 18.0  | 0.0   | 2                                     | 7.7   | 0.4   | 6.5        | 8.5   |
| Vitamin B6 (mg)  | 6                            | 2.9    | 2.4   | 3                                         | 2.9   | 2.7   | 2                               | 8.0   | 2.8   | 3                                     | 18.9  | 27.1  | 0.6        | 0.7   |
| Vitamin B12 (µg) | 9                            | 6.9    | 4.3   | 4                                         | 6.6   | 5.5   | 2                               | 5.8   | 4.6   | 4                                     | 6.2   | 3.2   | 0.8        | 0.8   |
| Folate (µg)      | 7                            | 214.3  | 69.0  | 3                                         | 185.7 | 122.1 | 2                               | 350.0 | 70.7  | -                                     | -     | -     | 100.0      | 100.0 |
| Calcium (mg)     | 4                            | 300.0  | 200.0 | 3                                         | 138.1 | 107.2 | 1                               | 200.0 | 0.0   | -                                     | -     | -     | 400.0      | 350.0 |
| Iron (mg)        | 5                            | 25.0   | 24.6  | 3                                         | 14.0  | 0.0   | 2                               | 20.0  | 5.7   | -                                     | -     | -     | 7.4        | 4.4   |
| Magnesium (mg)   | 1                            | 100.0  | 0.0   | 3                                         | 71.4  | 49.5  | 2                               | 214.3 | 69.0  | -                                     | -     | -     | 135.0      | 150.0 |
| Zinc (mg)        | 3                            | 13.3   | 2.9   | 3                                         | 8.8   | 6.9   | 2                               | 15.0  | 0.0   | 1                                     | 5.0   | 0.0   | 3.5        | 4.8   |
| Selenium (µg)    | 2                            | 42.5   | 17.7  | 1                                         | 55.0  | 0.0   | 1                               | 150.0 | 0.0   | -                                     | -     | -     | 30.0       | 37.5  |
| Iodine (µg)      | 3                            | 125.0  | 43.3  | 1                                         | 150.0 | 0.0   | 1                               | 100.0 | 0.0   | 1                                     | 75.0  | 0.0   | 70.0       | 70.0  |
| Vitamin D (µg)   | 8                            | 8.4    | 3.5   | 4                                         | 8.8   | 2.5   | 6                               | 7.9   | 4.6   | 4                                     | 25.0  | 33.4  | 5.0        | 5.0   |
| End              |                              |        |       |                                           |       |       |                                 |       |       |                                       |       |       |            |       |
| Vitamin A (µg)   | 2                            | 800.0  | 0.0   | 6                                         | 685.7 | 279.9 | 2                               | 800.0 | 0.0   | 3                                     | 833.3 | 57.7  | 300.0      | 350.0 |
| Vitamin C (mg)   | 2                            | 85.0   | 7.1   | 3                                         | 105.9 | 90.1  | 1                               | 90.0  | 0.0   | 3                                     | 90.0  | 0.0   | 20.0       | 20.0  |
| Thiamine (mg)    | 2                            | 1.8    | 1.0   | 8                                         | 3.7   | 5.8   | 1                               | 2.5   | 0.0   | 4                                     | 4.1   | 4.0   | 0.4        | 0.5   |
| Riboflavin (mg)  | 2                            | 2.1    | 1.0   | 8                                         | 2.9   | 3.0   | 1                               | 2.8   | 0.0   | 4                                     | 5.5   | 6.4   | 0.6        | 0.7   |
| Niacin (mg)      | 2                            | 17.0   | 1.4   | 8                                         | 18.2  | 14.1  | 1                               | 18.0  | 0.0   | 4                                     | 19.3  | 3.9   | 6.5        | 8.5   |
| Vitamin B6 (mg)  | 3                            | 2.8    | 2.8   | 8                                         | 3.4   | 2.6   | 1                               | 6.0   | 0.0   | 5                                     | 24.7  | 42.2  | 0.6        | 0.7   |
| Vitamin B12 (µg) | 8                            | 173.8  | 70.0  | 9                                         | 3.8   | 3.6   | 1                               | 2.5   | 0.0   | 5                                     | 17.6  | 19.3  | 0.8        | 0.8   |
| Folate (µg)      | 3                            | 200.0  | 100.0 | 8                                         | 223.2 | 128.4 | 1                               | 300.0 | 0.0   | 4                                     | 416.8 | 173.4 | 100.0      | 100.0 |
| Calcium (mg)     | 2                            | 200.0  | 0.0   | 7                                         | 149.0 | 87.2  | 1                               | 200.0 | 0.0   | 4                                     | 232.5 | 116.4 | 400.0      | 350.0 |

|                |   |       |      |   |       |      |   |      |     |   |       |      |       |       |
|----------------|---|-------|------|---|-------|------|---|------|-----|---|-------|------|-------|-------|
| Iron (mg)      | 3 | 14.0  | 0.0  | 6 | 12.0  | 4.9  | 1 | 14.0 | 0.0 | 3 | 15.33 | 2.3  | 7.4   | 4.4   |
| Magnesium (mg) | 1 | 100.0 | 0.0  | 5 | 65.7  | 46.9 | - | -    | -   | 1 | 42.0  | 0.0  | 135.0 | 150.0 |
| Zinc (mg)      | 2 | 12.5  | 3.5  | 7 | 9.7   | 6.1  | 1 | 15.0 | 0.0 | 3 | 13.7  | 2.3  | 3.5   | 4.8   |
| Selenium (µg)  | 2 | 42.5  | 17.7 | 3 | 39.3  | 27.2 | - | -    | -   | 1 | 55.0  | 0.0  | 30.0  | 37.5  |
| Iodine (µg)    | 3 | 125.0 | 43.3 | 4 | 117.9 | 64.3 | - | -    | -   | 1 | 150.0 | 0.0  | 70.0  | 70.0  |
| Vitamin D (µg) | 6 | 8.8   | 2.1  | 7 | 6.6   | 3.4  | 4 | 12.5 | 2.9 | 6 | 19.6  | 27.9 | 5.0   | 5.0   |

-; Not applicable

**Table S6.** Average micronutrient intake provided by dietary supplements recorded in the Food Frequency Questionnaire (FFQ) in the 2020 cohort at baseline and end, compared with 10% of the Reference Nutrient Intake (RNI).

| Baseline         |                              |       |       |                                          |       |      |                                       |       |       |            |       |
|------------------|------------------------------|-------|-------|------------------------------------------|-------|------|---------------------------------------|-------|-------|------------|-------|
|                  | Vegan (VV)<br>( <i>n</i> 14) |       |       | Vegetarian-vegan (VegV)<br>( <i>n</i> 3) |       |      | Omnivore-vegan (OV)<br>( <i>n</i> 13) |       |       | 50% of RNI |       |
|                  | <i>n</i>                     | Mean  | SD    | <i>n</i>                                 | Mean  | SD   | <i>n</i>                              | Mean  | SD    | Female     | Male  |
| Vitamin A (µg)   | 3                            | 633.3 | 288.7 | 1                                        | 800.0 | 0.0  | 2                                     | 600.0 | 282.8 | 300.0      | 350.0 |
| Vitamin C (mg)   | 4                            | 65.0  | 19.2  | 1                                        | 80.0  | 0.0  | 2                                     | 46.0  | 48.1  | 20.0       | 20.0  |
| Thiamine (mg)    | 3                            | 4.1   | 5.1   | 1                                        | 1.1   | 0.0  | 2                                     | 6.1   | 6.3   | 0.4        | 0.5   |
| Riboflavin (mg)  | 3                            | 2.6   | 2.1   | 1                                        | 5.0   | 0.0  | 2                                     | 7.8   | 8.1   | 0.6        | 0.7   |
| Niacin (mg)      | 3                            | 22.7  | 11.6  | 1                                        | 16.0  | 0.0  | 2                                     | 30.5  | 20.5  | 6.5        | 8.5   |
| Vitamin B6 (mg)  | 4                            | 3.3   | 4.5   | 1                                        | 2.0   | 0.0  | 2                                     | 4.8   | 3.8   | 0.6        | 0.7   |
| Vitamin B12 (µg) | 12                           | 120.8 | 295.3 | 1                                        | 30.0  | 0.0  | 4                                     | 19.7  | 21.0  | 0.8        | 0.8   |
| Folate (µg)      | 3                            | 240.0 | 144.2 | 1                                        | 200.0 | 0.0  | 2                                     | 380.0 | 28.3  | 100.0      | 100.0 |
| Calcium (mg)     | 1                            | 200.0 | 0.0   | 1                                        | 200.0 | 0.0  | 2                                     | 260.0 | 198.0 | 400.0      | 350.0 |
| Iron (mg)        | 3                            | 14.0  | 0.0   | 1                                        | 14.0  | 0.0  | 1                                     | 14.0  | 0.0   | 7.4        | 4.4   |
| Magnesium (mg)   | 2                            | 63.5  | 51.6  | 1                                        | 60.0  | 0.0  | 3                                     | 102.6 | 53.0  | 135.0      | 150.0 |
| Zinc (mg)        | 2                            | 12.5  | 3.5   | 1                                        | 10.0  | 0.0  | 2                                     | 9.5   | 0.7   | 3.5        | 4.8   |
| Selenium (µg)    | 2                            | 77.5  | 31.8  | 1                                        | 100.0 | 0.0  | 1                                     | 55.0  | 0.0   | 30.0       | 37.5  |
| Iodine (µg)      | 2                            | 150.0 | 0.0   | 1                                        | 150.0 | 0.0  | 1                                     | 150.0 | 0.0   | 70.0       | 70.0  |
| Vitamin D (µg)   | 8                            | 20.9  | 22.1  | 1                                        | 20.0  | 0.0  | 7                                     | 12.5  | 7.0   | 5.0        | 5.0   |
| End              |                              |       |       |                                          |       |      |                                       |       |       |            |       |
| Vitamin A (µg)   | 3                            | 800.0 | 0.0   | 2                                        | 800.0 | 0.0  | 5                                     | 800.0 | 0.0   | 300.0      | 350.0 |
| Vitamin C (mg)   | 4                            | 75.0  | 10.0  | 2                                        | 85.0  | 7.1  | 5                                     | 82.0  | 2.5   | 20.0       | 20.0  |
| Thiamine (mg)    | 4                            | 3.3   | 4.5   | 2                                        | 1.8   | 1.0  | 5                                     | 1.5   | 0.6   | 0.4        | 0.5   |
| Riboflavin (mg)  | 4                            | 2.3   | 1.8   | 2                                        | 2.1   | 1.0  | 5                                     | 1.8   | 0.6   | 0.6        | 0.7   |
| Niacin (mg)      | 4                            | 21.0  | 0.0   | 2                                        | 17.0  | 1.4  | 5                                     | 16.4  | 0.9   | 6.5        | 8.5   |
| Vitamin B6 (mg)  | 4                            | 3.6   | 4.3   | 2                                        | 3.7   | 3.3  | 4                                     | 2.7   | 2.2   | 0.6        | 0.7   |
| Vitamin B12 (µg) | 11                           | 85.9  | 172.6 | 2                                        | 10.0  | 10.6 | 8                                     | 11.3  | 19.9  | 0.8        | 0.8   |
| Folate (µg)      | 4                            | 250.0 | 100.0 | 2                                        | 250.0 | 70.7 | 5                                     | 260.0 | 89.4  | 100.0      | 100.0 |
| Calcium (mg)     | 1                            | 200.0 | 0.0   | 2                                        | 200.0 | 0.0  | 5                                     | 184.0 | 35.8  | 400.0      | 350.0 |
| Iron (mg)        | 3                            | 14.0  | 0.0   | 2                                        | 14.0  | 0.0  | 5                                     | 14.0  | 0.0   | 7.4        | 4.4   |

|                |   |       |      |   |       |     |   |       |      |       |       |
|----------------|---|-------|------|---|-------|-----|---|-------|------|-------|-------|
| Magnesium (mg) | 2 | 63.5  | 51.6 | 1 | 27.0  | 0.0 | 3 | 37.0  | 17.3 | 135.0 | 150.0 |
| Zinc (mg)      | 2 | 20.0  | 7.1  | 2 | 12.5  | 3.5 | 4 | 11.3  | 2.5  | 3.5   | 4.8   |
| Selenium (µg)  | 2 | 77.5  | 31.8 | 2 | 55.0  | 0.0 | 3 | 55.0  | 0.0  | 30.0  | 37.5  |
| Iodine (µg)    | 2 | 150.0 | 0.0  | 1 | 150.0 | 0.0 | 3 | 150.0 | 0.0  | 70.0  | 70.0  |
| Vitamin D (µg) | 8 | 17.5  | 15.6 | 2 | 7.5   | 3.5 | 9 | 19.1  | 30.8 | 5.0   | 5.0   |



**Table S7.** Baseline micronutrient knowledge in the 2019 cohort.

| Dietary group                                |                              |                                               |                                    |                                           |          |
|----------------------------------------------|------------------------------|-----------------------------------------------|------------------------------------|-------------------------------------------|----------|
|                                              | Vegan (VV)<br>( <i>n</i> 24) | Vegetarian-<br>vegan (VegV)<br>( <i>n</i> 15) | Omnivore<br>(OO)<br>( <i>n</i> 20) | Omnivore-<br>vegan (OV)<br>( <i>n</i> 23) | <i>P</i> |
| Self-assessed micronutrient Awareness        |                              |                                               |                                    |                                           |          |
| Yes (%)                                      | 4.2                          | 20.0                                          | 30.0                               | 26.1                                      | 0.098    |
| No (%)                                       | 95.8                         | 80.0                                          | 70.0                               | 73.9                                      |          |
| Awareness of Specific Micronutrients         |                              |                                               |                                    |                                           |          |
| Vitamin A (%)                                | 25.0                         | 13.3                                          | 35.0                               | 34.8                                      | 0.447    |
| Vitamin C (%)                                | 45.8                         | 26.7                                          | 50.0                               | 43.5                                      | 0.573    |
| Niacin (%)                                   | 4.2                          | 0.0                                           | 0.0                                | 0.0                                       | -        |
| Vitamin B6 (%)                               | 4.2                          | 0.0                                           | 0.0                                | 0.0                                       | -        |
| Vitamin B12 (%)                              | 50.0                         | 33.3                                          | 20.0                               | 8.7                                       | 0.012*   |
| Folate (%)                                   | 4.2                          | 0.0                                           | 5.0                                | 0.0                                       | -        |
| Calcium (%)                                  | 33.3                         | 26.7                                          | 40.0                               | 30.4                                      | 0.865    |
| Iron (%)                                     | 54.2                         | 53.3                                          | 35.0                               | 43.5                                      | 0.587    |
| Magnesium (%)                                | 8.3                          | 0.0                                           | 15.0                               | 8.7                                       | 0.543    |
| Potassium (%)                                | 12.5                         | 6.7                                           | 15.0                               | 13                                        | 0.967    |
| Sodium (%)                                   | 0.0                          | 6.7                                           | 5.0                                | 8.7                                       | 0.549    |
| Zinc (%)                                     | 12.5                         | 13.3                                          | 10.0                               | 17.4                                      | 0.943    |
| Selenium (%)                                 | 8.3                          | 6.7                                           | 5.0                                | 4.3                                       | 1.000    |
| Iodine (%)                                   | 20.8                         | 6.7                                           | 15.0                               | 17.4                                      | 0.753    |
| Vitamin D                                    | 45.8                         | 33.3                                          | 50.0                               | 47.8                                      | 0.796    |
| Awareness of Micronutrient Deficiencies      |                              |                                               |                                    |                                           |          |
| Yes (%)                                      | 58.3                         | 66.7                                          | 55.0                               | 65.2                                      | 0.216    |
| No (%)                                       | 41.7                         | 33.3                                          | 45.0                               | 34.8                                      |          |
| Non-Specific<br>Deficiency<br>Symptom (%)    | 16.7                         | 12.3                                          | 4.2                                | 4.3                                       | 0.882    |
| Vitamin A (%)                                | 10.0                         | 13.3                                          | 4.2                                | 4.3                                       | 0.650    |
| Vitamin C (%)                                | 20.8                         | 13.3                                          | 25.0                               | 21.7                                      | 0.873    |
| B Vitamins (non-<br>inclusive of B12)<br>(%) | 8.3                          | 6.7                                           | 5.0                                | 8.7                                       | 1.000    |
| Vitamin B12 (%)                              | 25                           | 6.7                                           | 20.0                               | 0.0                                       | 0.032*   |
| Folate (%)                                   | 0.0                          | 0.0                                           | 5.0                                | 4.3                                       | -        |
| Calcium (%)                                  | 0.0                          | 0.0                                           | 5.0                                | 17.4                                      | -        |
| Iron (%)                                     | 33.3                         | 33.3                                          | 20.0                               | 8.7                                       | 0.148    |
| Magnesium (%)                                | 0.0                          | 6.7                                           | 0.0                                | 0.0                                       | -        |
| Zinc (%)                                     | 8.3                          | 0.0                                           | 5.0                                | 0.0                                       | -        |
| Iodine (%)                                   | 4.2                          | 6.7                                           | 20.0                               | 13                                        | 0.377    |
| Vitamin D (%)                                | 12.5                         | 26.7                                          | 20.0                               | 21.7                                      | 0.709    |

Fisher-Freeman-Halton Exact Test (P < 0.05).

-; Not applicable analysis for more than two groups had counts less than 1.

**Table S8.** Baseline record of iodine knowledge (%) by dietary group in 2020.

| Responses                                              | Vegan<br>(VV) ( <i>n</i> 45) | Vegetarian-vegan<br>(VegV) ( <i>n</i> 6) | Omnivore<br>(OO) ( <i>n</i> 6) | Omnivore-vegan<br>(OV) ( <i>n</i> 16) | <i>P</i> |
|--------------------------------------------------------|------------------------------|------------------------------------------|--------------------------------|---------------------------------------|----------|
| Awareness of the importance of adequate dietary intake |                              |                                          |                                |                                       |          |
| Yes                                                    | 75.6                         | 33.3                                     | 83.3                           | 87.5                                  | 0.692    |
| No                                                     | 24.4                         | 66.7                                     | 16.7                           | 12.5                                  |          |
| Symptoms correctly identified                          |                              |                                          |                                |                                       |          |
| Yes                                                    | 33.3                         | 33.3                                     | 66.7                           | 62.5                                  | <.001*   |
| No                                                     | 66.7                         | 66.7                                     | 33.3                           | 37.5                                  |          |
| Knowledge of iodine deficiency symptoms                |                              |                                          |                                |                                       |          |
| Mental Retardation                                     | 8.9                          | 16.7                                     | 33.3                           | 18.8                                  | 0.206    |
| Malformations in pregnancy (Birth defects)             | 13.3                         | 16.7                                     | 33.3                           | 18.8                                  | 0.649    |
| Goitre /enlargement of the thyroid gland               | 11.1                         | 33.3                                     | 33.3                           | 50.0                                  | 0.008*   |
| Impaired physical development during childhood         | 15.6                         | 16.7                                     | 16.7                           | 25.0                                  | 0.751    |
| Neural Tube Defects                                    | 6.7                          | 0.0                                      | 16.7                           | 0.0                                   | 0.371    |
| Heart conditions                                       | 11.1                         | 0.0                                      | 16.7                           | 18.6                                  | 0.584    |
| Weak immune system                                     | 20.0                         | 66.7                                     | 16.7                           | 37.5                                  | 0.062    |
| Blindness                                              | 0.0                          | 0.0                                      | 16.7                           | 0.0                                   | -        |
| Weak bones and teeth                                   | 6.7                          | 33.3                                     | 0.9                            | 12.5                                  | 0.180    |
| Arthritis                                              | 2.2                          | 0.0                                      | 0.0                            | 0.0                                   | -        |
| Other                                                  | 8.9                          | 0.0                                      | 0.0                            | 0.0                                   | -        |
| Do not know/<br>no response                            | 48.9                         | 33.3                                     | 33.3                           | 12.5                                  | 0.089    |
| Understanding of iodine in the life cycle              |                              |                                          |                                |                                       |          |
| Elderly adults                                         | 2.2                          | 0.0                                      | 0.0                            | 0.0                                   | -        |
| Adults                                                 | 0.0                          | 0.0                                      | 0.0                            | 25.0                                  | -        |

|                                                               |      |       |       |      |        |
|---------------------------------------------------------------|------|-------|-------|------|--------|
| Pregnant and breastfeeding women                              | 9.0  | 0.0   | 2.0   | 7.0  | 0.116  |
| Women of childbearing age                                     | 0.0  | 0.0   | 33.3  | 0.0  | -      |
| Teenagers                                                     | 15.6 | 0.0   | 0.0   | 0.0  | -      |
| Babies and young children                                     | 15.6 | 33.3  | 16.7  | 12.5 | 0.614  |
| Don't know                                                    | 46.7 | 66.7  | 16.7  | 18.8 | 0.065  |
| Perceptions of the main food sources of iodine in the UK diet |      |       |       |      |        |
| Cow's milk and dairy                                          | 2.2  | 0.0   | 33.3  | 18.8 | 0.021* |
| Fish and seafood                                              | 35.6 | 66.7  | 66.7  | 43.8 | 0.292  |
| Eggs                                                          | 2.2  | 0.0   | 0.0   | 6.2  | 0.623  |
| Meat and meat products                                        | 4.4  | 0.0   | 0.0   | 0.0  | -      |
| Nuts and seeds                                                | 0.0  | 0.0   | 0.0   | 12.5 | -      |
| Table salt                                                    | 0.0  | 0.0   | 0.0   | 6.2  | -      |
| Vegetables                                                    | 17.8 | 0.0   | 0.0   | 6.2  | 0.499  |
| Don't know                                                    | 26.7 | 33.3  | 0.0   | 6.2  | 0.133  |
| Knowledge of iodine deficiency being a problem in the UK      |      |       |       |      |        |
| Yes                                                           | 33.3 | 0.0   | 50.0  | 81.2 | <.001* |
| No                                                            | 15.6 | 33.3  | 16.7  | 6.2  |        |
| Don't know                                                    | 51.1 | 66.7  | 33.3  | 12.5 |        |
| Reported planning their diet to include sources of iodine     |      |       |       |      |        |
| Yes                                                           | 6.7  | 0.0   | 100.0 | 81.2 | <.001* |
| No                                                            | 75.6 | 66.7  | 0.0   | 6.2  |        |
| Unsure or don't know                                          | 17.8 | 33.3  | 0.0   | 12.5 |        |
| Currently receiving iodine information                        |      |       |       |      |        |
| Yes                                                           | 6.7  | 0.0   | 16.7  | 18.8 | <.001* |
| No                                                            | 88.9 | 100.0 | 83.3  | 81.2 |        |
| Unsure or don't know                                          | 4.4  | 0.0   | 0.0   | 0.0  |        |
| Total iodine knowledge score (mean)                           |      |       |       |      |        |
| Total score                                                   | 1.4  | 1.5   | 3.0   | 2.8  | 0.004* |

Fisher-Freeman-Halton Exact Test (P < 0.05).

-; Not applicable analysis for more than two groups had counts less than 1.
